# Supplementary material
Source: Copernicus journal article supplement (doi:10.5194/acp-26-6223-2026)
Supplement: Supplementary file 1 [file acp-26-6223-2026-supplement.pdf]

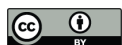

*Supplement of*

## **The role of chemical boundary conditions in simulating summer ozone and cross-boundary transport over China**

**Yunsong Du et al.**

*Correspondence to:* Nan Wang (nan.wang@scu.edu.cn)

The copyright of individual parts of the supplement might differ from the article licence.

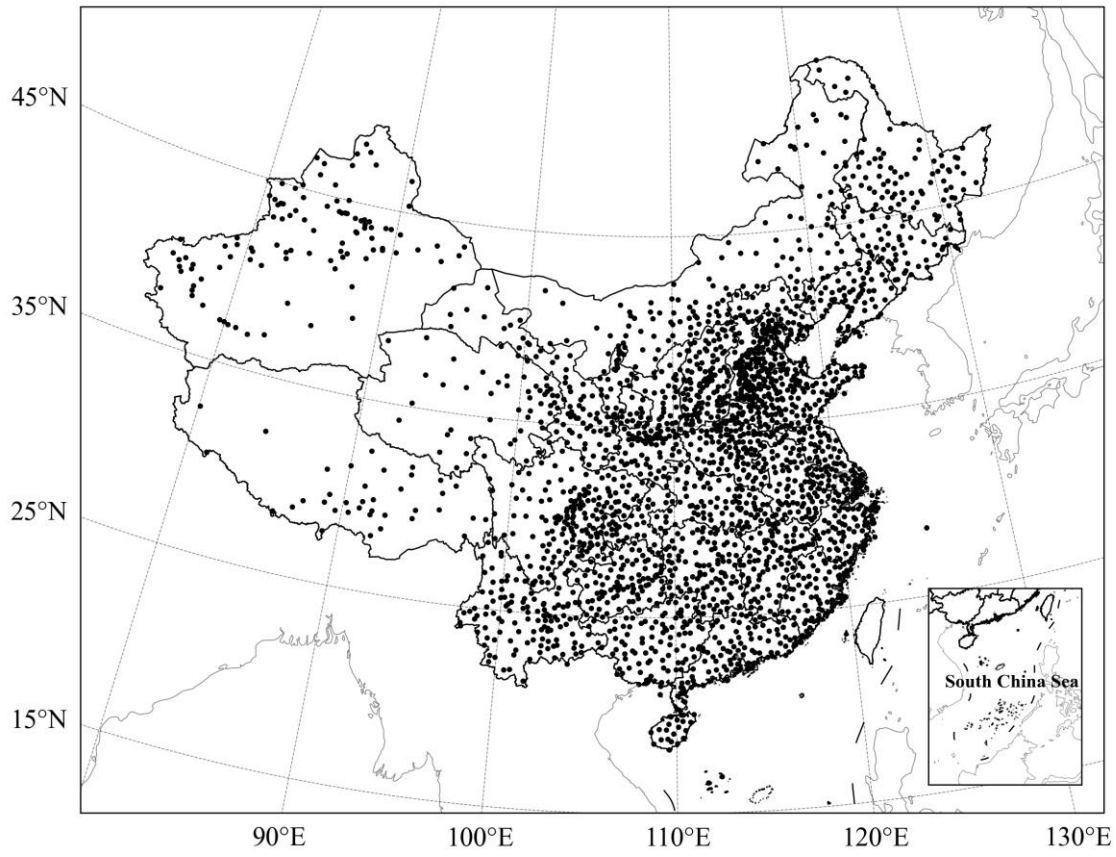

24

25

**Fig. S1.** Surface meteorological observation station location.

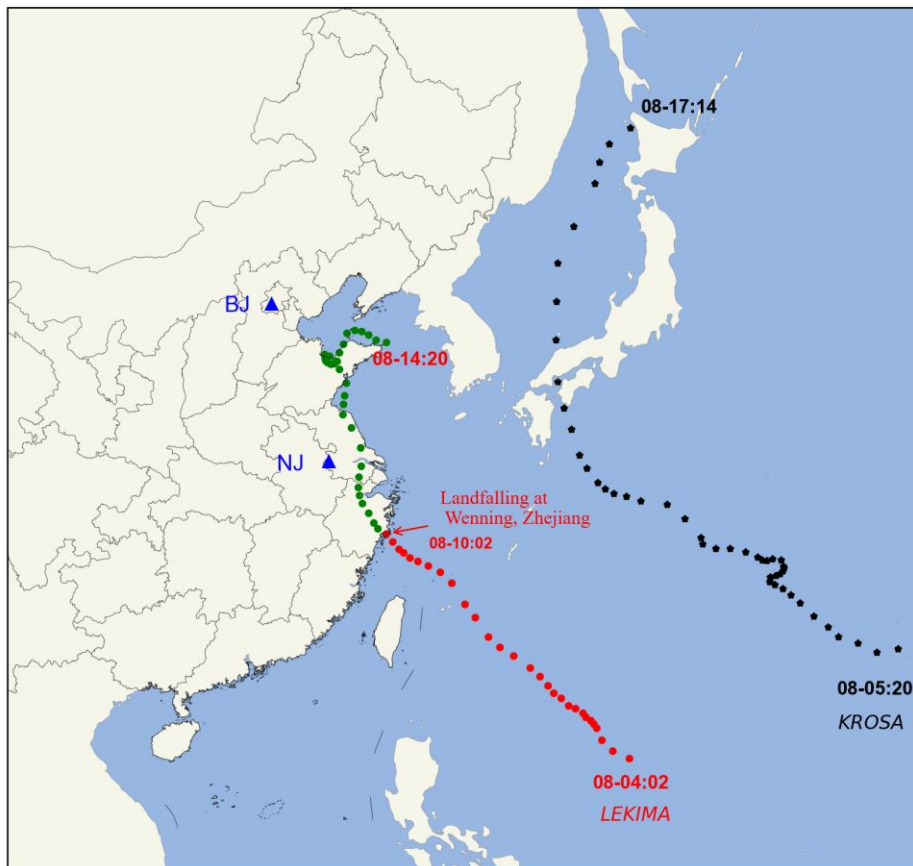

26

27 **Fig. S2.** Trajectories of Typhoons Lekima and Krosa. Green dots mark Lekima's path  
 28 after landfall. Blue triangles indicate the locations of Beijing (BJ) and Nanjing (NJ). All  
 29 times are shown in local time.

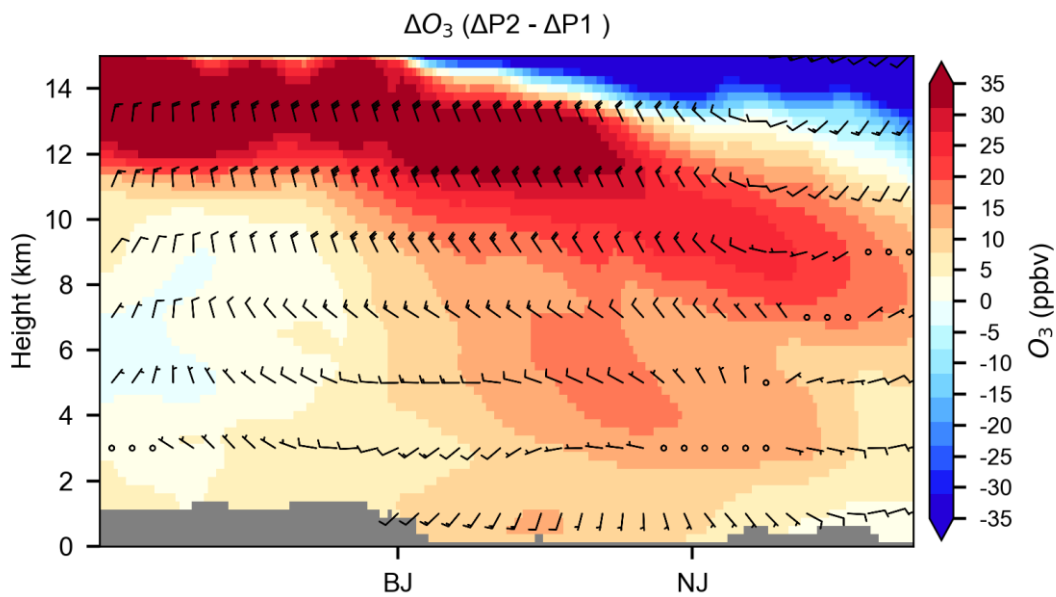

30

31 **Fig. S3.** Vertical cross-sectional analysis of the  $O_3$  and wind difference between P2 (Fig.  
 32 9c) and P1 (Fig. 9a).

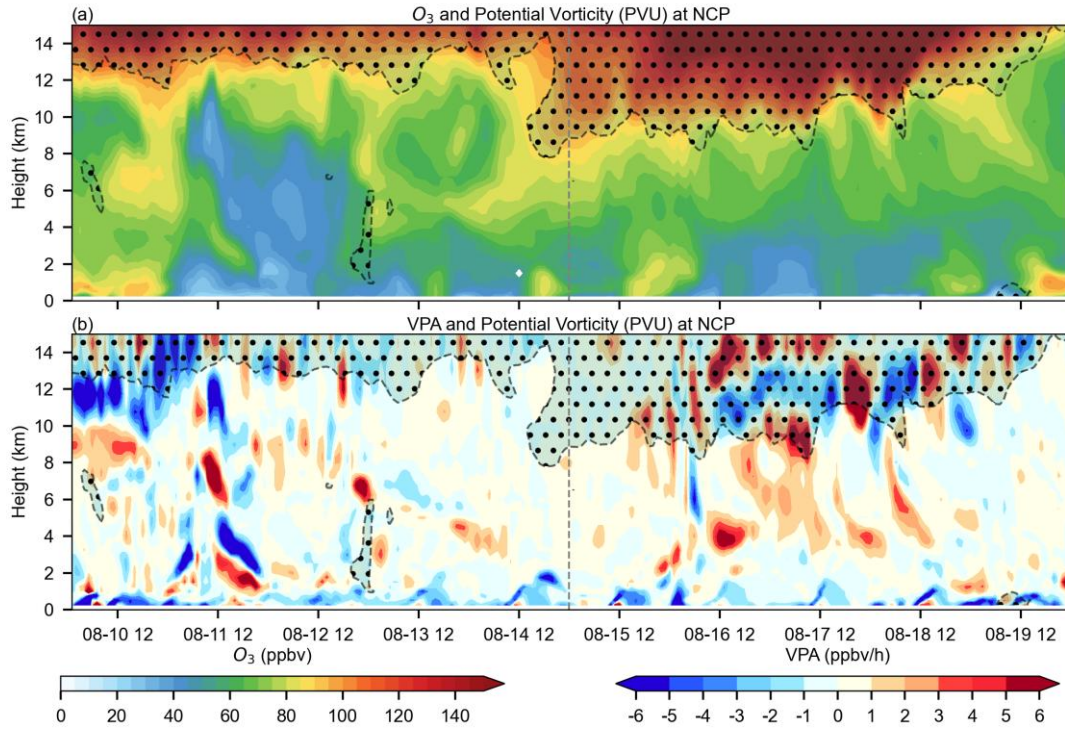

33  
34  
35  
36  
37  
38

**Fig. S4.** The Vertical time cross-sectional analysis of the  $O_3$  and VPA (calculated by CMAQ process analysis as the sum of vertical diffusion and vertical advection) during P1 and P2 processes in the North China Plain (NCP) region. The black dots areas represent regions where  $PVU > 2$ , and the black contour lines represent  $PVU = 2$ .

39 **Table S1.** Subregions and the provinces included in each subregion.

| subregion       | Provinces included                           |
|-----------------|----------------------------------------------|
| South China     | Fujian, Guangdong, Guangxi, Hainan, Jiangxi  |
| East China      | Anhui, Jiangsu, Shanghai, Shandong, Zhejiang |
| North China     | Beijing, Hebei, Neimenggu, Shanxi, Tianjin   |
| Central China   | Henan, Hubei, Hunan                          |
| Northeast China | Heilongjiang, Jilin, Liaoning                |
| Northwest China | Gansu, Ningxia, Qinghai, shannxi, Xinjiang   |
| Southwest China | Sichuan, Chongqing, Guizhou, Yunnan, Xizang  |

40

41 **Table S2.** Surface and vertical observation data.

| <b>Surface Observation Data</b>                |                        |                                     |                             |                                                                                                                             |                                                                                                                                      |                                                    |
|------------------------------------------------|------------------------|-------------------------------------|-----------------------------|-----------------------------------------------------------------------------------------------------------------------------|--------------------------------------------------------------------------------------------------------------------------------------|----------------------------------------------------|
| <b>Dataset Name</b>                            | <b>Stations number</b> | <b>Variables</b>                    | <b>Temporal Resolution</b>  | <b>Source</b>                                                                                                               |                                                                                                                                      | <b>Data Periods</b>                                |
| Meteorological Observations                    | 2394                   | T2, T2max, RH2, WS10, PRS,PRECIP    | <u>hourly</u>               | National Meteorological Information Center<br>( <a href="http://data.cma.cn">http://data.cma.cn</a> )                       |                                                                                                                                      | July–August 2019                                   |
| O <sub>3</sub> Observations                    | 1480                   | O <sub>3</sub>                      | <u>hourly</u>               | China National Environmental Monitoring Center<br>( <a href="https://air.cnemc.cn:18007/">https://air.cnemc.cn:18007/</a> ) |                                                                                                                                      |                                                    |
| <b>O<sub>3</sub> Vertical Observation Data</b> |                        |                                     |                             |                                                                                                                             |                                                                                                                                      |                                                    |
| <b>Site Name</b>                               | <b>Location</b>        | <b>Altitude Above Sea Level (m)</b> | <b>Launching Time (LST)</b> | <b>number of profiles</b>                                                                                                   | <b>Source</b>                                                                                                                        | <b>Data Periods</b>                                |
| Hongkong                                       | 114.17E, 22.31N        | 66                                  | 13:00-14:00                 | 9                                                                                                                           | World Ozone and Ultraviolet Radiation Data Centre (WOUDC, <a href="https://woudc.org/data.php">https://woudc.org/data.php</a> )      | 03/07/2019 to 28/08/2022                           |
| Nanjing                                        | 118.90E, 31.93N        | 20                                  | 14:00                       | 4                                                                                                                           | China Air Pollution Data Center (CAPDC, <a href="https://www.capdatabase.cn">https://www.capdatabase.cn</a> )                        | 23/07/2019, 25/07/2019, 31/08/2020, 01/09/2020     |
| Lhasa                                          | 91.14E, 29.66N         | 3650                                | 23:00 to 02:00              | 12                                                                                                                          | National Tibetan Plateau Data Center (TPDC, <a href="https://data.tpdc.ac.cn/home">https://data.tpdc.ac.cn/home</a> , Bai, Z., 2022) | 31/07/2019 to 21/08/2019, 04/08/2020 to 19/08/2020 |
| Lijiang                                        | 100.22E, 26.85N        | 2389                                | 23:00 to 02:00              | 5                                                                                                                           |                                                                                                                                      | 02/07/2022 to 30/08/2022                           |

| Golmud                                      | 94.91E,<br>36.42N | 2754                                  | 23:00 to<br>02:00         | 8                                                        |                                                                              | 30/07/2020 to<br>30/08/2020,<br>27/06/2021 to<br>28/08/2021 |
|---------------------------------------------|-------------------|---------------------------------------|---------------------------|----------------------------------------------------------|------------------------------------------------------------------------------|-------------------------------------------------------------|
| <b>Tropospheric Ozone Column (TOC) Data</b> |                   |                                       |                           |                                                          |                                                                              |                                                             |
| <b>Satellite</b>                            | <b>Area</b>       | <b>Variables</b>                      | <b>Spatial Resolution</b> | <b>Sensor</b>                                            | <b>Source</b>                                                                | <b>Data Periods</b>                                         |
| Gaofen-5 satellite                          | China<br>Mainland | Tropospheric<br>Ozone (TOC)<br>Column | 1 km × 1 km               | ultraviolet-<br>visible<br>hyperspectral<br>spectrometer | University of Science and Technology of<br>China (USTC), Zhao et al. (2024). | July–August 2019                                            |

42

43

44 **Table S3.** The average of observed and simulated avg-O3MDA8 and 90th-O3MDA8 for China and seven regions in July-August 2019. (Number  
 45 of monitoring sites in parentheses).

|                                     |                  | <b>China</b>  | <b>E</b>     | <b>N</b>     | <b>S</b>     | <b>C</b>     | <b>NE</b>    | <b>NW</b>    | <b>SW</b>    |
|-------------------------------------|------------------|---------------|--------------|--------------|--------------|--------------|--------------|--------------|--------------|
|                                     |                  | <b>(1480)</b> | <b>(319)</b> | <b>(181)</b> | <b>(256)</b> | <b>(204)</b> | <b>(166)</b> | <b>(154)</b> | <b>(200)</b> |
| <b>Avg-O3MDA8</b><br><b>(ppbv)</b>  | <b>OBS</b>       | 59.4          | 64.7         | 73.5         | 46.9         | 66.7         | 49.5         | 64.1         | 51.0         |
|                                     | <b>BASE</b>      | 56.0          | 59.6         | 57.3         | 51.4         | 66.6         | 44.7         | 52.9         | 55.7         |
|                                     | <b>H-CMAQ</b>    | 58.7          | 60.4         | 62.9         | 51.7         | 68.0         | 47.5         | 60.6         | 59.3         |
|                                     | <b>GEOS-Chem</b> | 59.2          | 61.5         | 64.3         | 51.2         | 68.8         | 48.5         | 60.8         | 58.7         |
|                                     | <b>CESM2.2</b>   | 62.3          | 63.0         | 68.4         | 52.9         | 70.7         | 50.7         | 68.7         | 63.4         |
| <b>90th-O3MDA8</b><br><b>(ppbv)</b> | <b>OBS</b>       | 82.8          | 93.2         | 98.6         | 68.9         | 89.4         | 71.3         | 78.9         | 75.2         |
|                                     | <b>BASE</b>      | 75.0          | 85.4         | 79.1         | 71.9         | 83.8         | 62.9         | 63.4         | 68.6         |
|                                     | <b>H-CMAQ</b>    | 78.1          | 87.3         | 82.6         | 73.2         | 85.7         | 65.8         | 70.7         | 73.4         |
|                                     | <b>GEOS-Chem</b> | 78.9          | 89.1         | 83.7         | 73.7         | 86.8         | 67.3         | 70.6         | 73.1         |
|                                     | <b>CESM2.2</b>   | 82.3          | 90.6         | 87.2         | 75.6         | 89.1         | 69.2         | 79.4         | 79.5         |

46

47

48 **Table S4.** Evaluation of avg-O3MDA8 model performance in China and seven regions across four scenarios, using the metrics MB, and RMSE  
 49 (in ppbv), and IOA, r and NMB (unitless).

|             |                  | <b>China<br/>(1480)</b> | <b>E<br/>(319)</b> | <b>N<br/>(181)</b> | <b>S<br/>(256)</b> | <b>C<br/>(204)</b> | <b>NE<br/>(166)</b> | <b>NW<br/>(154)</b> | <b>SW<br/>(200)</b> |
|-------------|------------------|-------------------------|--------------------|--------------------|--------------------|--------------------|---------------------|---------------------|---------------------|
| <b>MB</b>   | <b>BASE</b>      | -3.39                   | -5.14              | -16.16             | 4.46               | -0.01              | -4.84               | -11.21              | 4.68                |
|             | <b>H-CMAQ</b>    | -0.65                   | -4.26              | -10.54             | 4.84               | 1.39               | -2.08               | -3.50               | 8.30                |
|             | <b>GEOS-Chem</b> | -0.19                   | -3.24              | -9.13              | 4.31               | 2.16               | -1.07               | -3.34               | 7.73                |
|             | <b>CESM2.2</b>   | 2.90                    | -1.68              | -5.10              | 5.99               | 4.09               | 1.15                | 4.59                | 12.40               |
| <b>NMB</b>  | <b>BASE</b>      | -5.7%                   | -8.7%              | -27.2%             | 7.5%               | 0.0%               | -8.2%               | -18.9%              | 7.9%                |
|             | <b>H-CMAQ</b>    | -1.1%                   | -7.2%              | -17.8%             | 8.2%               | 2.3%               | -3.5%               | -5.9%               | 14.0%               |
|             | <b>GEOS-Chem</b> | -0.3%                   | -5.5%              | -15.4%             | 7.3%               | 3.6%               | -1.8%               | -5.6%               | 13.0%               |
|             | <b>CESM2.2</b>   | 4.9%                    | -2.8%              | -8.6%              | 10.1%              | 6.9%               | 1.9%                | 7.7%                | 20.9%               |
| <b>RMSE</b> | <b>BASE</b>      | 10.81                   | 10.46              | 17.80              | 6.78               | 7.16               | 10.26               | 13.77               | 7.71                |
|             | <b>H-CMAQ</b>    | 9.34                    | 9.76               | 13.17              | 7.08               | 6.98               | 9.55                | 7.34                | 10.24               |
|             | <b>GEOS-Chem</b> | 8.75                    | 9.09               | 11.86              | 6.78               | 6.83               | 9.10                | 7.17                | 9.62                |
|             | <b>CESM2.2</b>   | 9.49                    | 8.67               | 9.66               | 7.99               | 7.64               | 9.40                | 7.67                | 14.22               |
| <b>IOA</b>  | <b>BASE</b>      | 0.77                    | 0.59               | 0.58               | 0.79               | 0.77               | 0.71                | 0.48                | 0.86                |
|             | <b>H-CMAQ</b>    | 0.82                    | 0.64               | 0.65               | 0.78               | 0.80               | 0.71                | 0.66                | 0.78                |
|             | <b>GEOS-Chem</b> | 0.85                    | 0.68               | 0.70               | 0.79               | 0.82               | 0.74                | 0.68                | 0.80                |
|             | <b>CESM2.2</b>   | 0.83                    | 0.71               | 0.74               | 0.75               | 0.80               | 0.71                | 0.66                | 0.67                |
| <b>r</b>    | <b>BASE</b>      | 0.66                    | 0.44               | 0.73               | 0.77               | 0.78               | 0.66                | 0.42                | 0.84                |
|             | <b>H-CMAQ</b>    | 0.73                    | 0.49               | 0.69               | 0.77               | 0.79               | 0.63                | 0.54                | 0.85                |
|             | <b>GEOS-Chem</b> | 0.77                    | 0.53               | 0.72               | 0.76               | 0.81               | 0.65                | 0.56                | 0.86                |
|             | <b>CESM2.2</b>   | 0.75                    | 0.54               | 0.66               | 0.76               | 0.81               | 0.63                | 0.57                | 0.78                |

51 **Table S5.** Evaluation of 90th-O3MDA8 model performance in China and seven regions across four scenarios, using the metrics MB, and RMSE  
 52 (in ppbv), and IOA ,r and NMB (unitless).

|             |                  | <b>China<br/>(1480)</b> | <b>E<br/>(319)</b> | <b>N<br/>(181)</b> | <b>S<br/>(256)</b> | <b>C<br/>(204)</b> | <b>NE<br/>(166)</b> | <b>NW<br/>(154)</b> | <b>SW<br/>(200)</b> |
|-------------|------------------|-------------------------|--------------------|--------------------|--------------------|--------------------|---------------------|---------------------|---------------------|
| <b>MB</b>   | <b>BASE</b>      | -7.75                   | -7.74              | -19.50             | 3.03               | -5.51              | -8.41               | -15.56              | -6.65               |
|             | <b>H-CMAQ</b>    | -4.70                   | -5.83              | -16.03             | 4.31               | -3.67              | -5.51               | -8.25               | -1.85               |
|             | <b>GEOS-Chem</b> | -3.85                   | -4.11              | -14.93             | 4.82               | -2.56              | -4.06               | -8.37               | -2.18               |
|             | <b>CESM2.2</b>   | -0.43                   | -2.55              | -11.44             | 6.73               | -0.24              | -2.11               | 0.43                | 4.28                |
| <b>NMB</b>  | <b>BASE</b>      | -13.1%                  | -13.0%             | -32.9%             | 5.1%               | -9.3%              | -14.2%              | -26.2%              | -11.2%              |
|             | <b>H-CMAQ</b>    | -7.9%                   | -9.8%              | -27.0%             | 7.3%               | -6.2%              | -9.3%               | -13.9%              | -3.1%               |
|             | <b>GEOS-Chem</b> | -6.5%                   | -6.9%              | -25.2%             | 8.1%               | -4.3%              | -6.8%               | -14.1%              | -3.7%               |
|             | <b>CESM2.2</b>   | -0.7%                   | -4.3%              | -19.3%             | 11.3%              | -0.4%              | -3.6%               | 0.7%                | 7.2%                |
| <b>RMSE</b> | <b>BASE</b>      | 14.57                   | 15.48              | 22.16              | 10.25              | 10.11              | 13.41               | 17.29               | 11.23               |
|             | <b>H-CMAQ</b>    | 12.91                   | 14.79              | 19.38              | 10.50              | 9.29               | 11.97               | 10.84               | 10.33               |
|             | <b>GEOS-Chem</b> | 12.39                   | 14.08              | 18.43              | 10.62              | 8.89               | 11.17               | 10.85               | 9.66                |
|             | <b>CESM2.2</b>   | 12.31                   | 13.78              | 16.19              | 11.49              | 8.78               | 10.74               | 8.22                | 13.61               |
| <b>IOA</b>  | <b>BASE</b>      | 0.78                    | 0.48               | 0.62               | 0.83               | 0.75               | 0.78                | 0.60                | 0.87                |
|             | <b>H-CMAQ</b>    | 0.81                    | 0.48               | 0.64               | 0.83               | 0.76               | 0.80                | 0.73                | 0.86                |
|             | <b>GEOS-Chem</b> | 0.83                    | 0.49               | 0.66               | 0.83               | 0.77               | 0.82                | 0.73                | 0.89                |
|             | <b>CESM2.2</b>   | 0.82                    | 0.50               | 0.67               | 0.81               | 0.76               | 0.83                | 0.78                | 0.77                |
| <b>r</b>    | <b>BASE</b>      | 0.73                    | 0.25               | 0.74               | 0.75               | 0.68               | 0.80                | 0.77                | 0.88                |
|             | <b>H-CMAQ</b>    | 0.75                    | 0.25               | 0.73               | 0.76               | 0.68               | 0.81                | 0.79                | 0.86                |
|             | <b>GEOS-Chem</b> | 0.76                    | 0.26               | 0.73               | 0.77               | 0.68               | 0.82                | 0.80                | 0.88                |
|             | <b>CESM2.2</b>   | 0.73                    | 0.27               | 0.70               | 0.78               | 0.66               | 0.82                | 0.70                | 0.70                |

53
